# Supplementary material for: Active but not inactive granulomatosis with polyangiitis is associated with decreased and phenotypically and functionally altered CD56dim natural killer cells
Source: PubMed Central journal article supplement (PMC5022237; doi:10.1186/s13075-016-1098-7), 2016-09-13

**A**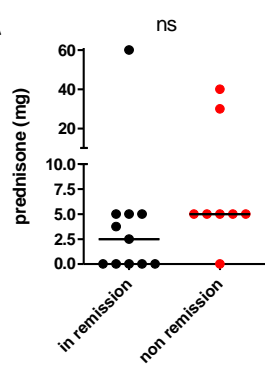**B**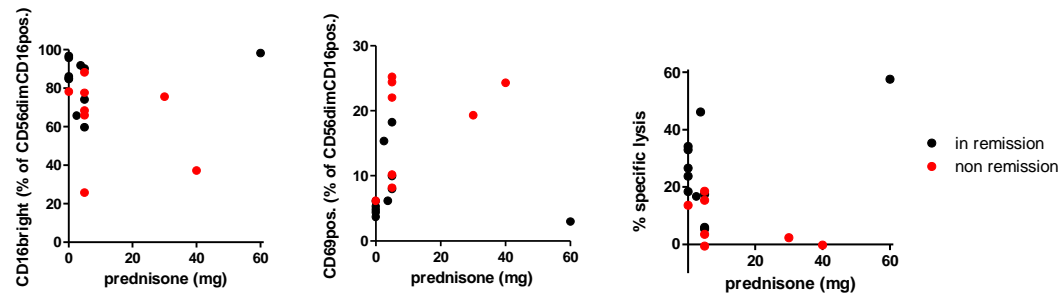**C**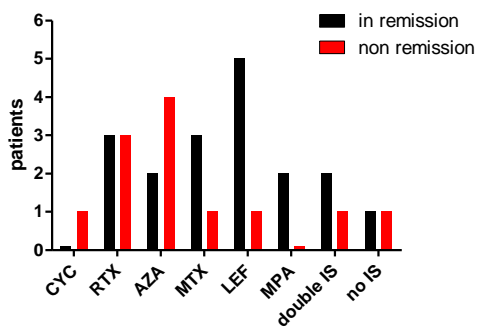**D**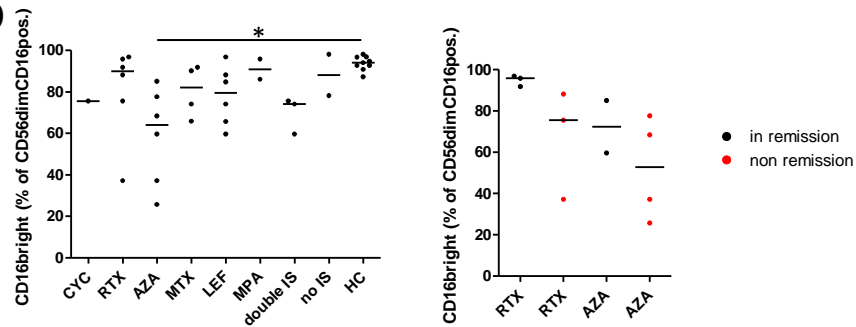**E**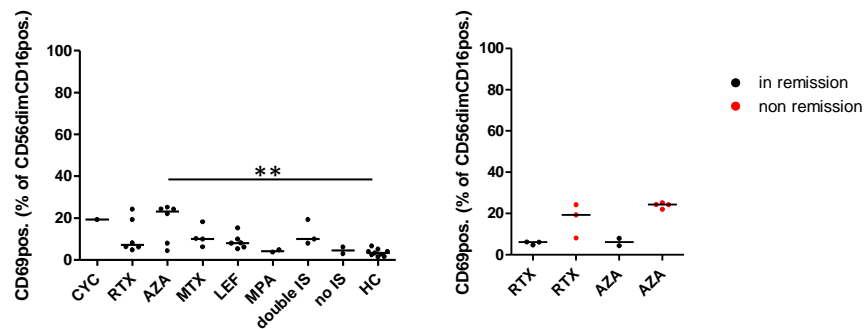**F**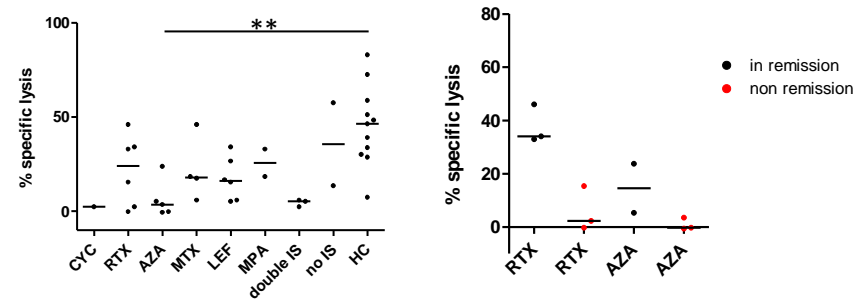

Supplement: 13075_2016_1098_MOESM4_ESM.pdf [file 13075_2016_1098_MOESM4_ESM.pdf]
